# Supplementary material
Source: MDPI journal article supplement (https://www.mdpi.com/2079-9284/7/3/61)
Supplement: s1 [file s1]

## SUPPLEMENTARY INFORMATION

# Inhibitory Effects of the Bioactive Thermorubin Isolated from the Fungus *Thermoactinomyces Antibioticus* on Melanogenesis

Shilpi Goenka<sup>1,\*</sup> and Sanford R. Simon<sup>1,2,3</sup>

<sup>1</sup> Department of Biomedical Engineering, Stony Brook University, Stony Brook, NY, USA

<sup>2</sup> Department of Biochemistry and Cellular Biology, Stony Brook University, Stony Brook, NY, USA

<sup>3</sup> Department of Pathology, Stony Brook University, Stony Brook, NY, USA

\* Correspondence: Shilpi Goenka  
Department of Biomedical Engineering  
Stony Brook University, Stony Brook, NY 11794-5281.  
Email: shilpi.goenka@stonybrook.edu

### MITF protein expression in B16F10 cells.

$4.5 \times 10^3$  B16F10 cells/well were inoculated in a 96-well plate and grown for 48 h after which TR was added in the presence or absence of  $\alpha$ -MSH and treatment was continued for 72 h. At the end of treatments, the cells were processed using a cell-based MITF ELISA kit (LSBio, Seattle, USA) according to the manufacturer instructions. Relative levels of MITF protein of compound-treated and untreated control were normalized by crystal violet stain absorbances to account for cell density variations in each well and results were expressed as % of control.

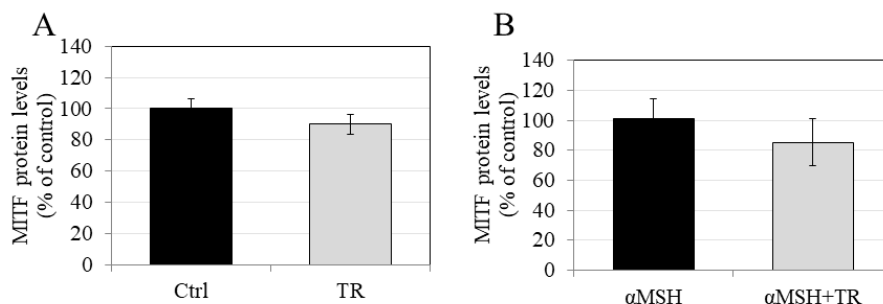

**Figure S1.** MITF protein levels in B16F10 cells treated with TR (25  $\mu$ M) under (A) Basal and (B)  $\alpha$ -MSH stimulated conditions; Data are mean  $\pm$  SD of triplicates. No significance was found by students unpaired t-test.

### MTS Cytotoxicity Assay in Human Keratinocytes.

HaCaT cells were procured from AddexBio (San Diego, CA, USA) and grown using DMEM supplemented with 10% HI-FBS and 1% antibiotics. For testing cytotoxicity of TR to HaCaT cells, we inoculated  $5 \times 10^3$  cells/well in a 96-well tissue culture plate and after 24 h, the medium was replaced by fresh medium containing TR at various concentrations and cultures maintained for another 72 h. At the end of treatments, wells were aspirated and 100  $\mu$ L of fresh culture medium with 20  $\mu$ L of MTS reagent was added and the plate was incubated for a period of 30 min at 37  $^{\circ}$ C. The absorbance was read at 490 nm using a microplate reader and cell viability was reported as % normalized to control group.

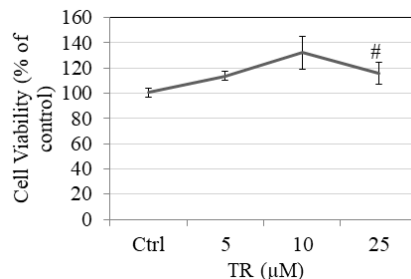

**Figure S2.** Viability of HaCaT cells treated with TR (5–25  $\mu$ M) for 72 h. One-way ANOVA with Dunnett's test, #  $p < 0.01$  vs. Ctrl; Data is mean  $\pm$  SD of triplicate determinations.
